# Supplementary material for: Global Analysis of the WOX Transcription Factor Family in Akebia trifoliata
Source: Preprints.org preprint supplement (doi:10.20944/preprints202311.0138.v1), 2023-11-02
Supplement: Supplementary file 1 [file supplementary]

1 10 20 30  
AktWUS .....METQQDPQQQLLQQQTLHEDGSTGSSSSKSSFLCRQTS.....  
AktWOX1 .....MASSNRHWPSPMFKSKPCNNHHQWQHDISSSLISSCQRPPTYSGFEERSPDPK.....  
AktWOX2 MGLERNCGEREKQLRTMEWVKQEQQQQQSGVMYVKVMTDEQMELLRKQISYATICEQLVEMHKAITAQQDLAGTKLGNLYCDSLMTSTGHKISS  
AktWOX3 .....MKVHQFTRGFWEHEPSLTGCKRLRPLAPKLTNGDVTPLDLKSFIKADSGPRKLSCTDDHKK  
AktWOX4 MGLEENCVEGEDQQRMMEWGRP...QQQSGALYVKVMTDEQMELLRKQISYATICERLVEMHKSISSQODLAGMKPGTLYCDPLMTSTGHKMSS  
AktWOX5 .....MEDKKVDVLSGEGHPAS.....  
AktWOX6 .....MSPATS.....  
AktWOX7 .....MWMMGCSNDGGLNISDSPFNGRKLRPLIPRATTSSSSSS.SSITTTTNTATHPCNLNLIHTSDLFM  
AktWOX8 .....MEDR.....  
AktWOX9 .....MDEGMSGFCIKAG...NGGINGGGTKCG.....

40 50 60 70 80 90 100 110  
AktWUS .....TRWTPPTDQIRILKDLIYNNGVRSPPSGEQTQRISARLRQYGKTEGKNVFYWFQNHKARERQKKRFTVDMAVQR  
AktWOX1 .....PRWNPKEQIRIRILEAFIN.SGMVNPPRDEIRKIRIQQLQEYGVGDANVFYWFQNRKSSRKHQRHLQTSKSHS  
AktWOX2 .....RQRWTPTPVQLQILERIFD.QGNGTPTIKQKIKEITINELTQHQQISETNVYNWFQNRARRSRKRQLVSTPNNAES  
AktWOX3 ESPQVEAQSG.....GTRWNPTEQEQIGILEMLYR.GGMRTPNNAQQIEQITAQLSKFGKIEGKNVFYWFQNHKARERQKKRNSLGLTHS  
AktWOX4 .....RQRWTPTPVQLQILERIFN.QGNGTTPSKPKIKEITINELMQHAQLSETNVYNWFQNRARRSRKRQLVTAPNNGES  
AktWOX5 .....WRWNPTEQOISMLEALYR.BGIKTPSAEQIQEITSRLKAYGYLEEKNVFYWFQNHKARERQKKRQKQDEKLFY  
AktWOX6 .....TRWCPTPEQLMILEEMYR.GGIRTPNGSGQIQQITAHLSFYGKIEGKNVFYWFQNHKARERQKKLRKLSRQQQQ  
AktWOX7 LNHHLATVSEQSKRDFNAQT VVS SRWNPTEQQLILEELYR.RGTRTPTADQIQQITVQLRRFGKIEGKNVFYWFQNHKARERQKKRRQAESTTEQ  
AktWOX8 .....SRWTPKPEQILILESFN.SGMVNPVKDETVRIRKMLEKYGSGVDANVFYWFQNRSSRRRQRQTQAGLTND  
AktWOX9 .....LRWNPTEAQVKVLTDLFR.SGLRTPSDTQIQKISQLSFGKIESKNVFYWFQNHKARERQKKR.....

120 130 140 150 160 170  
AktWUS SGAASSL.....TFSPTGFTSPSSPSSSPGVLVGVMQMSMGCGSVLMEKSFREDCTISSGGSGMGGSISNNMGW  
AktWOX1 QSPPVNTFTTAPSSSSSSSEKSSPKKTNKMLAMGGVNMIDLSNSPTASVNQTYFQTQGD FSSDQPFPPVQQIEGNTVFSQGFCFSDISNVQIPD  
AktWOX2 EVETE.....DNSPKEKKASENTHSPD.....NLTLRPDEMCFQSP EISSELHSFDPQPNQAEST  
AktWOX3 PR.....TPTATTIVPTDAN.....GEVEREEDSNYKRK.....QRSWAMENCFE.E  
AktWOX4 EVETE.....DESPKEKKAKTENIHSHE.....NLALRPDEKCLQS...SERHSLDPQHNVKVENT  
AktWOX5 INHS.....SRSPPILPSTPASSNVVCSPPFNQQRGFDYYPQCTNASLLGGIRRTPTNTDKMDKRKE..  
AktWOX6 LQQ.....QTNNHLLHHFEASPTG...FQQFHYYNLPQFLPQEGEQEASTQVMNYTWKVDNPESDE  
AktWOX7 QQQQQQQQQ...QREIENFENKELDFQVEQAKRWALPTNSSFLSEDAVSMQRAGRAVIAESRTDGWIOFEERELQRRRSVESHATWQMMHINA.T  
AktWOX8 PRNPIQ.....GGSGVIRYEPTSSVGCFASSPSFSPSLSSS.TSFVGSS..STCGGVSDGVDDLFSISHQMGLPEIDQNLCSSDTSNLHYES  
AktWOX9 .....RRVSFEDRGS.....

180 190 200 210 220 230 240  
AktWUS VGVDPYSSSYPPFYDKMKSIEFTFKEETPEIETLPFPMHGEDISGFCTGNPDPNNGY.....NTSSYRPDD  
AktWOX1 QTIGSCSGFLIGELLNQEVSK.EEEEEKMKFHQQLSYIHSSPTTLTTSIPLTITSPTSTINPTTFNQIQGVGESGAVDPADAGRSTVFINDVAFEV  
AktWOX2 FPSNGSSKSSSGSMGHISFYETVLSNPRIDHLLGKMEMPGSFNPYRQGEGYDMMG.....  
AktWOX3 DRRFCGDY.....DQGDKTLELFFLHPEGR.....  
AktWOX4 FPSDGGSKSSGSLGHISFYESVLSNPRMDHLLGKMEVPGSFNPYQQGEGYDMI.....  
AktWOX5 NGGAGYEYNMYPTQYDIHTTNVKSNGNPQT LVLPFLHPTGILEEKSRNPFNASF.....AVNSNQSTS  
AktWOX6 MEKWMKMYGRDWMMDVGPAPPCYSRPLKTLELFPINSTNLKDECSTSKQHVSF.....STTN..  
AktWOX7 TSAITTTTIGRTTMNPMLTNTQNP IRESESQTLQLFP LRSEDVEEKEKELPISSKN.....NNCTPYQYF  
AktWOX8 ...GLLTVFING..VPTEVPRGPFDMKAMFGQD VMLVHSSGVVPVNEYGISLQS.....LLLGES.....YFLN.FFFSW  
AktWOX9 ..IDREEKSLPT.KHFREVNQVKKPERE IETLQLFP LNPYEES...ESDEKL GW.....MRNEFKETT

250 260  
AktWUS EKGST.....RTSLELSLNSYTG RSPYTD.  
AktWOX1 SVGPFNVQRQAFGDDAVLLHSSGQPVLTNQGWVTFQSLQPGAFYYLV  
AktWOX2 .....  
AktWOX3 .....  
AktWOX4 .....  
AktWOX5 VETFI.....DDGSRDNTSL.....  
AktWOX6 .....  
AktWOX7 EFL.....  
AktWOX8 KVN.....TSFEVFRET LKINVVIHL.  
AktWOX9 NAFSY.....VIGREIDHPPLDLRLSFF..
