# Supplementary material for: Global Analysis of the WOX Transcription Factor Family in Akebia trifoliata
Source: Preprints.org preprint supplement (doi:10.20944/preprints202311.0138.v1), 2023-11-02
Supplement: Supplementary file 1 [file Supplementary Figure S1-S3.docx]

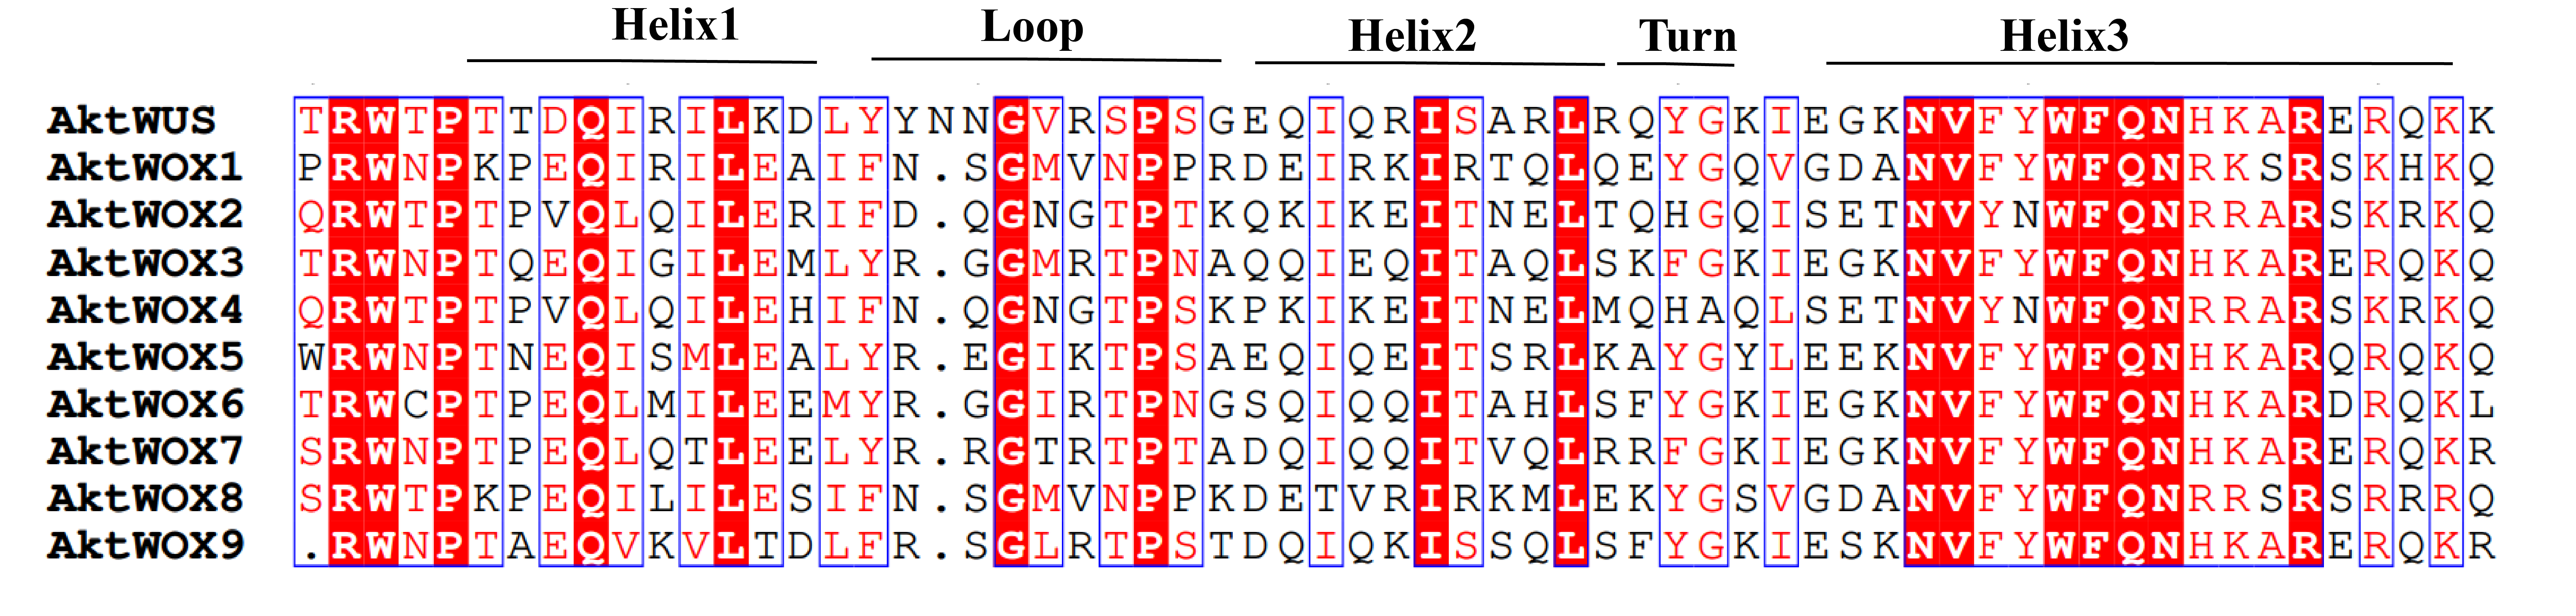


Figure S2 Alignment of the homeodomain sequences. Reds indicate residues that are highly conserved in homeodomains


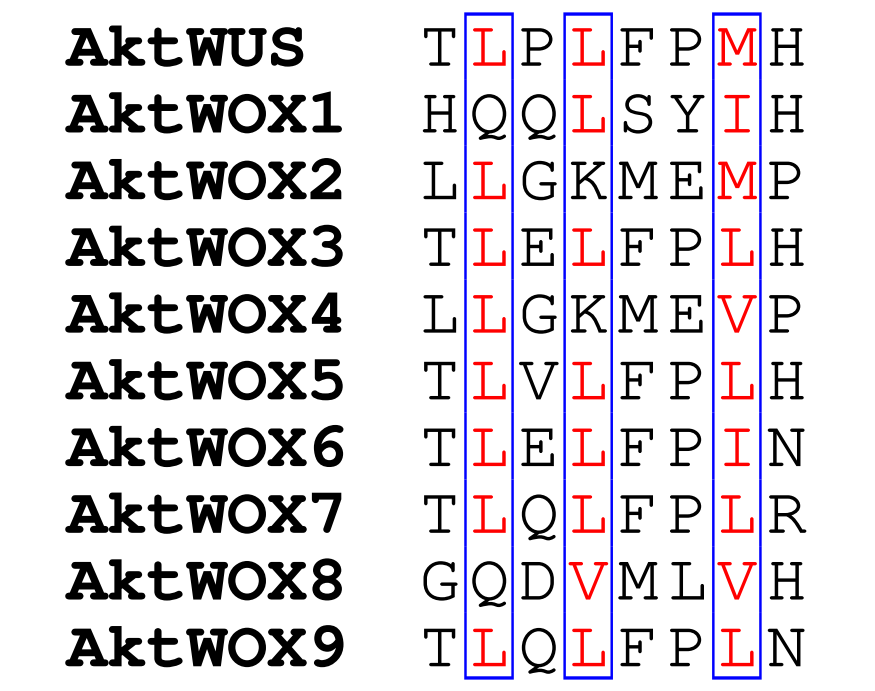


Figure S3 Alignment of the WUS box that is located downstream of the homeodomain


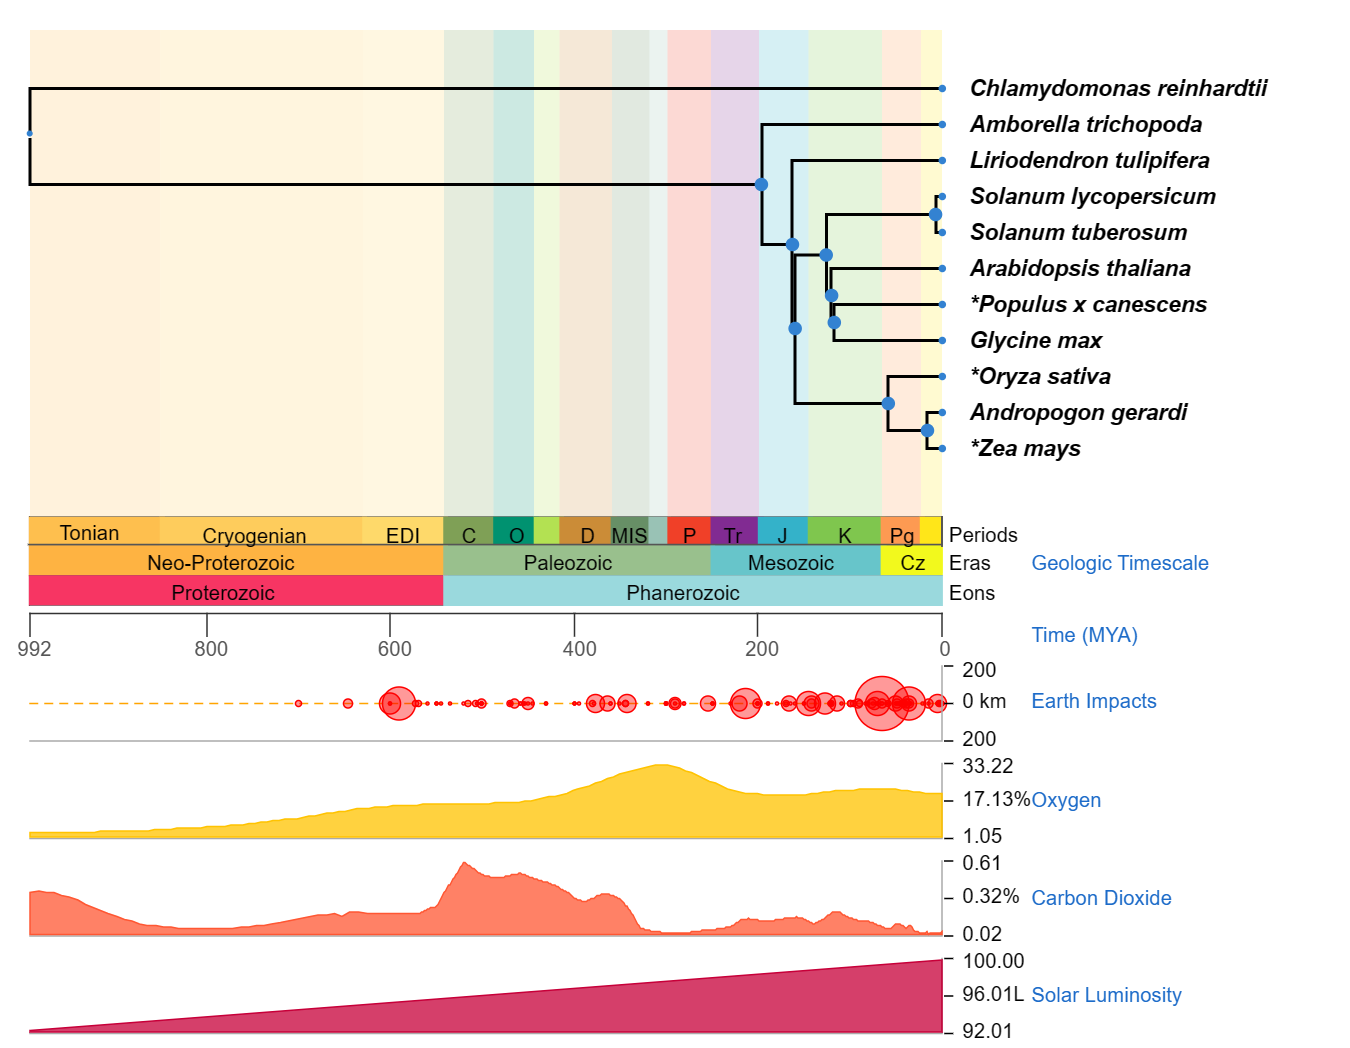


FigureS4 The evolution of twelve species over time (“MYA” represent millions of years ago)
