# Supplementary material for: Global Analysis of the WOX Transcription Factor Family in Akebia trifoliata
Source: Preprints.org preprint supplement (doi:10.20944/preprints202311.0138.v1), 2023-11-02
Supplement: Supplementary file 2 [file Table S1-S7.xlsx]

## Sheet: Table S1 
Table S1: secondary structure prediction
The name of the gene	Gene ID	Alpha helix%	Beta turn%	Random coil%	tended strand%
AktWOX1	EVM0003696	0.133	0.0416	0.7175	0.108
AktWOX2	EVM0020486	0.3082	0.0251	0.6308	0.0358
AktWOX3	EVM0004841	0.2547	0.0283	0.6557	0.0613
AktWOX4	EVM0001617	0.3321	0.0369	0.5756	0.0554
AktWOX5	EVM0011435	0.1767	0.0517	0.6681	0.1034
AktWOX6	EVM0002863	0.3182	0.0303	0.5707	0.0808
AktWOX7	EVM0019666	0.269	0.0316	0.5823	0.1171
AktWOX8	EVM0021763	0.1541	0.0616	0.6164	0.1678
AktWOX9	EVM0006854	0.2744	0.0605	0.5628	0.1023
AktWUS	EVM0022615	0.2472	0.0337	0.6292	0.0899

## Sheet: Table S2
Table S2 Conserved motifs of WOX protein in A. trifoliata
Conserved Motif	Conserved motif sequence	Domain
Motif-1	ILEEJYRSGMRTPSKDQIQEITAQLSQYGKIEGKNVFYWFQNHKARERQK	HD
Motif-2	RWNPTPEQJ	HD
Motif-3	YVKVMTDEQMELLRKQISIYATICERLVEMHKAITAQQDLAGMKPGNLYC
Motif-4	GHISFYESVLSNPRIDHLLGKMEMPGSFNPYRQGEGYDMI
Motif-5	TLLFPMHPE	WUS-box
Motif-6	QLVSAPNNGESEVETEDESPKEKKAKSENIHSPENLALRPDEKC
Motif-7	TVFINGVPFEVPRGPFDMKQAFGDDVMLLHSSGQPV
Motif-8	MGLEENCGEGEDQQRMMEW
Motif-9	NHHLWQH
Motif-10	MWMMGC

## Sheet: Table S3
Table S3: Synteny analysis of WOX genes between A. trifoliata and other plants.
Plant Species	Class	Homolog Genes	Homolog of Genes
Chlamydomonas reinhardtii	Chlorophyta		0
Zea mays	monocotyledonous	AktWOX6 AktWOX1 AktWOX9 AktWOX8(2)	5
Andropogon gerardi	monocotyledonous	AktWOX6 AktWOX1(3) AktWOX9 AktWOX5(3) AktWOX8(6)	14
Oryza sativa	monocotyledonous	AktWOX1 AktWOX5 AktWOX8	3
Amborella trichopoda	dicotyledonous	AktWOX4 AktWOX1 AktWOX5(2) AktWOX2 AktWOX8	6
Solanum tuberosum	dicotyledonous	AktWOX4 AktWOX3 AktWOX5 AktWOX7 AktWOX2 AktWUS	6
Arabidopsis thaliana	dicotyledonous	AktWOX4(2) AktWOX6 AktWOX1AktWOX7(2) AktWOX2(2)	8
Glycine max	dicotyledonous	AktWOX4(2) AktWOX1(2) AktWOX3(4) AktWOX5(4) AktWOX7(4) AktWOX2(2) AktWOX8	19
Solanum lycopersicum	dicotyledonous	AktWOX4 AktWOX1 AktWOX3 AktAktWOX5 AktWOX7 AktWOX2 AktWUS	7
Liriodendron tulipifera	dicotyledonous	AktWOX4(2) AktWOX1 AktWOX3 AktWOX5 AktWOX7(3) AktWOX2(2) AktWOX8 AktWUS	12
Populus × xiaohei	dicotyledonous	AktWOX4(3) AktWOX1(2) AktWOX3(2) AktWOX5(2) AktWOX7(4) AktWOX2(3) AktWUS(2)	18

## Sheet: Table S4
Table S4: The value of Ka/Ks
Seq_1	Seq_2	Ka	Ks	Ka/Ks
AktWOX1	AktWOX3	1.04491	3.45846	0.302133
AktWOX1	AktWOX9	0.964092	3.55689	0.271049
AktWOX1	AktWOX5	1.12924	3.74797	0.301295
AktWOX1	AktWOX7	1.20082	3.86216	0.31092
AktWOX1	AktWOX2	1.04871	3.73038	0.281125
AktWOX1	AktWOX8	0.736211	3.79849	0.193817
AktWOX1	AktWUS	1.20269	3.82301	0.314593
AktWOX2	AktWOX8	1.1035	3.5996	0.306562
AktWOX2	AktWUS	1.06982	99	0.0108063
AktWOX3	AktWOX9	0.725146	3.39332	0.213698
AktWOX3	AktWOX5	0.648219	3.50575	0.184901
AktWOX3	AktWOX7	0.800235	3.67128	0.217972
AktWOX3	AktWOX2	1.18706	99	0.0119905
AktWOX3	AktWOX8	0.974515	3.40302	0.286368
AktWOX3	AktWUS	0.721986	3.4802	0.207455
AktWOX4	AktWOX6	0.984218	3.25943	0.30196
AktWOX4	AktWOX1	1.11597	3.68027	0.30323
AktWOX4	AktWOX3	1.17073	3.53527	0.331158
AktWOX4	AktWOX9	1.12872	3.51342	0.321258
AktWOX4	AktWOX5	1.05089	3.50517	0.299811
AktWOX4	AktWOX7	1.20795	3.75525	0.321668
AktWOX4	AktWOX2	0.101314	0.393678	0.257353
AktWOX4	AktWOX8	1.1183	3.5937	0.311184
AktWOX4	AktWUS	1.09512	99	0.0110619
AktWOX5	AktWOX7	0.927786	3.67166	0.252688
AktWOX5	AktWOX8	1.04186	3.65022	0.285424
AktWOX5	AktWUS	0.911614	3.69794	0.246519
AktWOX5	AktWOX2	1.18954	3.57307	0.332917
AktWOX6	AktWOX1	1.07613	3.59837	0.299062
AktWOX6	AktWOX3	0.491802	99	0.0049677
AktWOX6	AktWOX9	0.615774	3.32969	0.184935
AktWOX6	AktWOX5	0.816288	3.61787	0.225626
AktWOX6	AktWOX7	0.681365	3.56631	0.191056
AktWOX6	AktWOX2	1.05313	3.32957	0.316296
AktWOX6	AktWOX8	1.15269	3.52372	0.327124
AktWOX6	AktWUS	0.815108	3.36426	0.242285
AktWOX7	AktWOX2	1.22633	3.77948	0.324471
AktWOX7	AktWOX8	1.21716	3.68136	0.330628
AktWOX7	AktWUS	1.13037	3.78082	0.298974
AktWOX8	AktWUS	1.18942	3.64872	0.325982
AktWOX9	AktWOX8	1.06169	3.39562	0.312663
AktWOX9	AktWUS	0.815098	3.42548	0.237951
AktWOX9	AktWOX5	0.894724	3.48641	0.256632
AktWOX9	AktWOX7	0.699426	3.47434	0.201312
AktWOX9	AktWOX2	1.16297	3.52981	0.32947

## Sheet: Table S5 
Table S5 Putative cis-elements in the promoter of AktWOXs
Cis-element	Typical sequence	Characteristic	Gene
ABRE	ACGTG	Abscisic acid responsiveness	AktWOX4, AktWOX5, AktWOX7, AktWOX8, AktWUS
TCA-element	TCAGAAGAGG	Salicylic acid responsiveness	AktWOX4, AktWOX1, AktWOX7, AktWUS
CGTCA-motif	CGTCA	MeJA-responsiveness	AktWOX1, AktWOX2, AktWOX3, AktWOX4, AktWOX5, AktWOX6, AktWOX7, AktWOX8, AktWOX9, AktWUS
TGA-element	AACGAC	Auxin-responsive element	AktWOX1, AktWOX3, AktWOX4, AktWOX7
LTR	CCGAAA	Low-temperature responsiveness	AktWOX2, AktWOX3, AktWOX5, AktWOX6
TC-rich repeats	GTTTTCTTAC	Defense and stress responsiveness	AktWOX6, AktWOX9, AktWOX8, AktWOX3, AktWOX4, AktWOX7
G-box	CACGTT	Light responsiveness	AktWOX1, AktWOX2, AktWOX3, AktWOX4, AktWOX5, AktWOX6, AktWOX7, AktWOX8, AktWOX9, AktWUS
CAT-box	GCCACT	Meristem expression	AktWOX6, AktWOX2, AktWOX9, AktWOX1, AktWOX5, AktWOX7, AktWUS
ARE	AAACCA	Essential for the anaerobic induction	AktWOX1, AktWOX2, AktWOX3, AktWOX4, AktWOX5, AktWOX6, AktWOX7, AktWOX8, AktWOX9, AktWUS
O2-site	GATGACATGG	Zein metabolism regulation	AktWOX1, AktWOX2, AktWOX4, AktWOX5, AktWOX6, AktWUS
CCAAT-box	CAACGG	flavonoid biosynthetic genes regulation	AktWOX6, AktWOX2

## Sheet: Table S6
Table S6 Specific primer sequence for WOX genes of A. trifoliata
gene		Primer sequence (5’ to 3’)
AktWOX1	F	CCAAGGGATGAGATAAGGAA
	R	GACGACGAAGAAGACGATG
AktWOX2	F	TGACAGATGAGCAGATGGAG
	R	TCTTGTTGAGCAGTAATGGC
AktWOX3	F	CGTGAAAGACAGAAGCAGAA
	R	GGAGAATGAGTGAGACCGA
AktWOX8	F	TTCTCCATCTTTCTCTCCATCT
	R	TCAACACCATCACTTACACCTC
AktWOX9	F	GAAAGACAGAAACGAAGGAGA
	R	AAGGGAAAGAGTTGCAGAGTT
AktWOX4	F	GAACTCCAAGTAAGCCGAAG
	R	GTTTGGTGCCGTAACAAGT
GAPDH	F	AGCAGCTTTGACCTCGTCAT
	R	AGTACTCCCCGCACTGAATG

## Sheet: Table S7
					Table S7 BP Enrich Result
GO_Name	GO_ID	GO_Level	P_value	EnrichmentScore	HitsGenesCountsInSelectedSet	HitsGenesCountsInBackground	AllGenesCountsInSelectedSet	AllGenesCountsInBackground	GenesOfSelectedSetInGOterm	corrected p-value(BH method)
reproduction	GO:0000003	2	1	1	6	6	8	8	AktWUS,AktWOX6,AktWOX3,AktWOX7,AktWOX1,AktWOX5,	1
cellular process	GO:0009987	2	1	1	8	8	8	8	AktWOX9,AktWUS,AktWOX6,AktWOX3,AktWOX7,AktWOX8,AktWOX1,AktWOX5,	1
cellular response to stimulus	GO:0051716	3	1	1	1	1	8	8	AktWOX3,	1
response to auxin	GO:0009733	6	1	1	1	1	8	8	AktWOX9,	1
RNA biosynthetic process	GO:0032774	8	1	1	7	7	8	8	AktWOX9,AktWUS,AktWOX6,AktWOX7,AktWOX8,AktWOX1,AktWOX5,	1
anatomical structure formation involved in morphogenesis	GO:0048646	3	1	1	3	3	8	8	AktWUS,AktWOX1,AktWOX5,	1
signaling	GO:0023052	4	1	1	1	1	8	8	AktWOX3,	1
anther development	GO:0048653	4	1	1	1	1	8	8	AktWUS,	1
reproductive system development	GO:0061458	5	1	1	6	6	8	8	AktWUS,AktWOX6,AktWOX3,AktWOX7,AktWOX1,AktWOX5,	1
regulation of nucleobase-containing compound metabolic process	GO:0019219	6	1	1	7	7	8	8	AktWOX9,AktWUS,AktWOX6,AktWOX7,AktWOX8,AktWOX1,AktWOX5,	1
organic substance biosynthetic process	GO:1901576	4	1	1	7	7	8	8	AktWOX9,AktWUS,AktWOX6,AktWOX7,AktWOX8,AktWOX1,AktWOX5,	1
regulation of metabolic process	GO:0019222	4	1	1	7	7	8	8	AktWOX9,AktWUS,AktWOX6,AktWOX7,AktWOX8,AktWOX1,AktWOX5,	1
regulation of cell growth	GO:0001558	6	1	1	1	1	8	8	AktWOX7,	1
organic substance metabolic process	GO:0071704	3	1	1	7	7	8	8	AktWOX9,AktWUS,AktWOX6,AktWOX7,AktWOX8,AktWOX1,AktWOX5,	1
meristem initiation	GO:0010014	3	1	1	1	1	8	8	AktWUS,	1
root morphogenesis	GO:0010015	5	1	1	1	1	8	8	AktWOX9,	1
shoot system morphogenesis	GO:0010016	4	1	1	2	2	8	8	AktWUS,AktWOX7,	1
response to karrikin	GO:0080167	4	1	1	1	1	8	8	AktWOX5,	1
stomium development	GO:0080166	4	1	1	1	1	8	8	AktWUS,	1
regulation of multicellular organismal process	GO:0051239	4	1	1	1	1	8	8	AktWOX9,	1
positive regulation of multicellular organismal process	GO:0051240	5	1	1	1	1	8	8	AktWOX9,	1
organic cyclic compound metabolic process	GO:1901360	4	1	1	7	7	8	8	AktWOX9,AktWUS,AktWOX6,AktWOX7,AktWOX8,AktWOX1,AktWOX5,	1
organic cyclic compound biosynthetic process	GO:1901362	5	1	1	7	7	8	8	AktWOX9,AktWUS,AktWOX6,AktWOX7,AktWOX8,AktWOX1,AktWOX5,	1
response to organic substance	GO:0010033	4	1	1	1	1	8	8	AktWOX9,	1
regulation of RNA metabolic process	GO:0051252	7	1	1	7	7	8	8	AktWOX9,AktWUS,AktWOX6,AktWOX7,AktWOX8,AktWOX1,AktWOX5,	1
floral organ development	GO:0048437	5	1	1	2	2	8	8	AktWUS,AktWOX7,	1
floral whorl development	GO:0048438	4	1	1	2	2	8	8	AktWUS,AktWOX7,	1
regulation of unidimensional cell growth	GO:0051510	7	1	1	1	1	8	8	AktWOX7,	1
carpel development	GO:0048440	6	1	1	1	1	8	8	AktWOX7,	1
petal development	GO:0048441	6	1	1	1	1	8	8	AktWOX7,	1
establishment of cell polarity	GO:0030010	4	1	1	1	1	8	8	AktWOX1,	1
stamen development	GO:0048443	6	1	1	1	1	8	8	AktWUS,	1
regulation of macromolecule biosynthetic process	GO:0010556	6	1	1	7	7	8	8	AktWOX9,AktWUS,AktWOX6,AktWOX7,AktWOX8,AktWOX1,AktWOX5,	1
floral organ morphogenesis	GO:0048444	6	1	1	1	1	8	8	AktWOX7,	1
carpel morphogenesis	GO:0048445	7	1	1	1	1	8	8	AktWOX7,	1
embryo development	GO:0009790	5	1	1	4	4	8	8	AktWOX3,AktWOX7,AktWOX1,AktWOX5,	1
petal morphogenesis	GO:0048446	7	1	1	1	1	8	8	AktWOX7,	1
post-embryonic development	GO:0009791	3	1	1	6	6	8	8	AktWUS,AktWOX6,AktWOX3,AktWOX7,AktWOX1,AktWOX5,	1
embryo development ending in seed dormancy	GO:0009793	6	1	1	3	3	8	8	AktWOX3,AktWOX1,AktWOX5,	1
formation of plant organ boundary	GO:0090691	5	1	1	2	2	8	8	AktWOX1,AktWOX5,	1
embryonic axis specification	GO:0000578	5	1	1	1	1	8	8	AktWOX5,	1
cellular aromatic compound metabolic process	GO:0006725	4	1	1	7	7	8	8	AktWOX9,AktWUS,AktWOX6,AktWOX7,AktWOX8,AktWOX1,AktWOX5,	1
axis specification	GO:0009798	4	1	1	2	2	8	8	AktWOX6,AktWOX5,	1
growth	GO:0040007	2	1	1	2	2	8	8	AktWOX7,AktWOX1,	1
centrolateral pattern formation	GO:0097353	5	1	1	1	1	8	8	AktWOX6,	1
regulation of growth	GO:0040008	4	1	1	2	2	8	8	AktWOX7,AktWOX1,	1
post-embryonic plant organ morphogenesis	GO:0090697	5	1	1	1	1	8	8	AktWOX7,	1
post-embryonic plant organ development	GO:0090696	5	1	1	1	1	8	8	AktWOX7,	1
plant organ development	GO:0099402	4	1	1	7	7	8	8	AktWOX9,AktWUS,AktWOX6,AktWOX7,AktWOX8,AktWOX1,AktWOX5,	1
regulation of anatomical structure morphogenesis	GO:0022603	5	1	1	1	1	8	8	AktWOX7,	1
post-embryonic plant morphogenesis	GO:0090698	4	1	1	1	1	8	8	AktWOX7,	1
regulation of cell morphogenesis	GO:0022604	6	1	1	1	1	8	8	AktWOX7,	1
cellular nitrogen compound metabolic process	GO:0034641	4	1	1	7	7	8	8	AktWOX9,AktWUS,AktWOX6,AktWOX7,AktWOX8,AktWOX1,AktWOX5,	1
primary meristem tissue development	GO:0010065	7	1	1	1	1	8	8	AktWOX3,	1
corolla development	GO:0048465	5	1	1	1	1	8	8	AktWOX7,	1
embryo sac development	GO:0009553	6	1	1	1	1	8	8	AktWOX7,	1
androecium development	GO:0048466	5	1	1	1	1	8	8	AktWUS,	1
cotyledon boundary formation	GO:0090451	6	1	1	2	2	8	8	AktWOX1,AktWOX5,	1
procambium histogenesis	GO:0010067	8	1	1	1	1	8	8	AktWOX3,	1
gynoecium development	GO:0048467	5	1	1	1	1	8	8	AktWOX7,	1
plant-type ovary development	GO:0035670	5	1	1	1	1	8	8	AktWOX7,	1
meristem maintenance	GO:0010073	3	1	1	2	2	8	8	AktWOX9,AktWOX1,	1
megagametogenesis	GO:0009561	3	1	1	1	1	8	8	AktWOX7,	1
maintenance of meristem identity	GO:0010074	5	1	1	1	1	8	8	AktWOX9,	1
system development	GO:0048731	4	1	1	8	8	8	8	AktWOX9,AktWUS,AktWOX6,AktWOX3,AktWOX7,AktWOX8,AktWOX1,AktWOX5,	1
regulation of cellular metabolic process	GO:0031323	5	1	1	7	7	8	8	AktWOX9,AktWUS,AktWOX6,AktWOX7,AktWOX8,AktWOX1,AktWOX5,	1
cell population proliferation	GO:0008283	3	1	1	3	3	8	8	AktWOX6,AktWOX1,AktWOX5,	1
regulation of meristem growth	GO:0010075	6	1	1	1	1	8	8	AktWOX1,	1
positive regulation of cell population proliferation	GO:0008284	6	1	1	2	2	8	8	AktWOX1,AktWOX5,	1
nucleobase-containing compound biosynthetic process	GO:0034654	6	1	1	7	7	8	8	AktWOX9,AktWUS,AktWOX6,AktWOX7,AktWOX8,AktWOX1,AktWOX5,	1
regulation of cellular biosynthetic process	GO:0031326	6	1	1	7	7	8	8	AktWOX9,AktWUS,AktWOX6,AktWOX7,AktWOX8,AktWOX1,AktWOX5,	1
root system development	GO:0022622	5	1	1	2	2	8	8	AktWOX9,AktWOX8,	1
maintenance of root meristem identity	GO:0010078	6	1	1	1	1	8	8	AktWOX9,	1
regulation of macromolecule metabolic process	GO:0060255	5	1	1	7	7	8	8	AktWOX9,AktWUS,AktWOX6,AktWOX7,AktWOX8,AktWOX1,AktWOX5,	1
plant ovule development	GO:0048481	5	1	1	1	1	8	8	AktWOX7,	1
biosynthetic process	GO:0009058	3	1	1	7	7	8	8	AktWOX9,AktWUS,AktWOX6,AktWOX7,AktWOX8,AktWOX1,AktWOX5,	1
unidimensional cell growth	GO:0009826	5	1	1	1	1	8	8	AktWOX7,	1
plant ovule morphogenesis	GO:0048482	5	1	1	1	1	8	8	AktWOX7,	1
macromolecule biosynthetic process	GO:0009059	5	1	1	7	7	8	8	AktWOX9,AktWUS,AktWOX6,AktWOX7,AktWOX8,AktWOX1,AktWOX5,	1
regulation of biological process	GO:0050789	3	1	1	8	8	8	8	AktWOX9,AktWUS,AktWOX6,AktWOX3,AktWOX7,AktWOX8,AktWOX1,AktWOX5,	1
cell division	GO:0051301	3	1	1	2	2	8	8	AktWOX3,AktWOX7,	1
gametophyte development	GO:0048229	5	1	1	1	1	8	8	AktWOX7,	1
positive regulation of stem cell population maintenance	GO:1902459	6	1	1	1	1	8	8	AktWOX9,	1
phloem or xylem histogenesis	GO:0010087	5	1	1	1	1	8	8	AktWOX3,	1
regulation of developmental process	GO:0050793	4	1	1	3	3	8	8	AktWOX9,AktWOX7,AktWOX1,	1
shoot axis formation	GO:0010346	5	1	1	1	1	8	8	AktWUS,	1
regulation of cellular process	GO:0050794	4	1	1	8	8	8	8	AktWOX9,AktWUS,AktWOX6,AktWOX3,AktWOX7,AktWOX8,AktWOX1,AktWOX5,	1
multicellular organism development	GO:0007275	4	1	1	8	8	8	8	AktWOX9,AktWUS,AktWOX6,AktWOX3,AktWOX7,AktWOX8,AktWOX1,AktWOX5,	1
cell fate commitment	GO:0045165	4	1	1	1	1	8	8	AktWOX5,	1
stipule development	GO:0010865	4	1	1	1	1	8	8	AktWOX6,	1
stem cell population maintenance	GO:0019827	4	1	1	2	2	8	8	AktWOX9,AktWUS,	1
meristem development	GO:0048507	5	1	1	4	4	8	8	AktWOX9,AktWUS,AktWOX3,AktWOX1,	1
embryonic meristem development	GO:0048508	6	1	1	1	1	8	8	AktWOX3,	1
regulation of meristem development	GO:0048509	5	1	1	1	1	8	8	AktWOX1,	1
positive regulation of biological process	GO:0048518	4	1	1	3	3	8	8	AktWOX9,AktWOX1,AktWOX5,	1
cell morphogenesis	GO:0000902	4	1	1	1	1	8	8	AktWOX7,	1
positive regulation of cellular process	GO:0048522	5	1	1	2	2	8	8	AktWOX1,AktWOX5,	1
axillary shoot meristem initiation	GO:0090506	4	1	1	1	1	8	8	AktWUS,	1
cellular process involved in reproduction in multicellular organism	GO:0022412	3	1	1	1	1	8	8	AktWUS,	1
reproductive process	GO:0022414	2	1	1	6	6	8	8	AktWUS,AktWOX6,AktWOX3,AktWOX7,AktWOX1,AktWOX5,	1
obsolete regulation of nucleic acid-templated transcription	GO:1903506	0	1	1	7	7	8	8	AktWOX9,AktWUS,AktWOX6,AktWOX7,AktWOX8,AktWOX1,AktWOX5,	1
regulation of cell population proliferation	GO:0042127	5	1	1	2	2	8	8	AktWOX1,AktWOX5,	1
developmental growth involved in morphogenesis	GO:0060560	4	1	1	1	1	8	8	AktWOX7,	1
heterocycle metabolic process	GO:0046483	4	1	1	7	7	8	8	AktWOX9,AktWUS,AktWOX6,AktWOX7,AktWOX8,AktWOX1,AktWOX5,	1
anatomical structure arrangement	GO:0048532	3	1	1	1	1	8	8	AktWUS,	1
positive regulation of developmental process	GO:0051094	5	1	1	1	1	8	8	AktWOX9,	1
nitrogen compound metabolic process	GO:0006807	3	1	1	7	7	8	8	AktWOX9,AktWUS,AktWOX6,AktWOX7,AktWOX8,AktWOX1,AktWOX5,	1
embryonic pattern specification	GO:0009880	4	1	1	1	1	8	8	AktWOX5,	1
response to abiotic stimulus	GO:0009628	3	1	1	1	1	8	8	AktWOX5,	1
apical cell fate commitment	GO:0010654	5	1	1	1	1	8	8	AktWOX5,	1
tissue development	GO:0009888	4	1	1	4	4	8	8	AktWOX9,AktWUS,AktWOX3,AktWOX1,	1
regulation of biosynthetic process	GO:0009889	5	1	1	7	7	8	8	AktWOX9,AktWUS,AktWOX6,AktWOX7,AktWOX8,AktWOX1,AktWOX5,	1
cellular component organization or biogenesis	GO:0071840	3	1	1	1	1	8	8	AktWOX7,	1
macromolecule metabolic process	GO:0043170	4	1	1	7	7	8	8	AktWOX9,AktWUS,AktWOX6,AktWOX7,AktWOX8,AktWOX1,AktWOX5,	1
maintenance of cell number	GO:0098727	3	1	1	2	2	8	8	AktWOX9,AktWUS,	1
fruit development	GO:0010154	5	1	1	3	3	8	8	AktWOX3,AktWOX1,AktWOX5,	1
cellular component organization	GO:0016043	4	1	1	1	1	8	8	AktWOX7,	1
cell growth	GO:0016049	3	1	1	1	1	8	8	AktWOX7,	1
flower development	GO:0009908	7	1	1	3	3	8	8	AktWUS,AktWOX6,AktWOX7,	1
anatomical structure morphogenesis	GO:0009653	3	1	1	5	5	8	8	AktWOX9,AktWUS,AktWOX7,AktWOX1,AktWOX5,	1
regulation of cellular component organization	GO:0051128	5	1	1	1	1	8	8	AktWOX7,	1
cotyledon development	GO:0048825	7	1	1	2	2	8	8	AktWOX1,AktWOX5,	1
regulation of stem cell population maintenance	GO:2000036	5	1	1	1	1	8	8	AktWOX9,	1
regionalization	GO:0003002	4	1	1	1	1	8	8	AktWOX6,	1
embryo sac morphogenesis	GO:0048314	5	1	1	1	1	8	8	AktWOX7,	1
phyllome development	GO:0048827	5	1	1	5	5	8	8	AktWUS,AktWOX6,AktWOX7,AktWOX1,AktWOX5,	1
seed development	GO:0048316	5	1	1	3	3	8	8	AktWOX3,AktWOX1,AktWOX5,	1
developmental process involved in reproduction	GO:0003006	3	1	1	6	6	8	8	AktWUS,AktWOX6,AktWOX3,AktWOX7,AktWOX1,AktWOX5,	1
adventitious root development	GO:0048830	6	1	1	1	1	8	8	AktWOX8,	1
nucleic acid metabolic process	GO:0090304	6	1	1	7	7	8	8	AktWOX9,AktWUS,AktWOX6,AktWOX7,AktWOX8,AktWOX1,AktWOX5,	1
meristem growth	GO:0035266	4	1	1	1	1	8	8	AktWOX1,	1
RNA metabolic process	GO:0016070	7	1	1	7	7	8	8	AktWOX9,AktWUS,AktWOX6,AktWOX7,AktWOX8,AktWOX1,AktWOX5,	1
reproductive shoot system development	GO:0090567	6	1	1	3	3	8	8	AktWUS,AktWOX6,AktWOX7,	1
cell differentiation	GO:0030154	4	1	1	1	1	8	8	AktWOX5,	1
cellular metabolic process	GO:0044237	3	1	1	7	7	8	8	AktWOX9,AktWUS,AktWOX6,AktWOX7,AktWOX8,AktWOX1,AktWOX5,	1
meristem structural organization	GO:0009933	4	1	1	1	1	8	8	AktWUS,	1
developmental growth	GO:0048589	3	1	1	2	2	8	8	AktWOX7,AktWOX1,	1
primary metabolic process	GO:0044238	3	1	1	7	7	8	8	AktWOX9,AktWUS,AktWOX6,AktWOX7,AktWOX8,AktWOX1,AktWOX5,	1
DNA-templated transcription	GO:0006351	9	1	1	7	7	8	8	AktWOX9,AktWUS,AktWOX6,AktWOX7,AktWOX8,AktWOX1,AktWOX5,	1
response to stimulus	GO:0050896	2	1	1	3	3	8	8	AktWOX9,AktWOX3,AktWOX5,	1
heterocycle biosynthetic process	GO:0018130	5	1	1	7	7	8	8	AktWOX9,AktWUS,AktWOX6,AktWOX7,AktWOX8,AktWOX1,AktWOX5,	1
regulation of DNA-templated transcription	GO:0006355	9	1	1	7	7	8	8	AktWOX9,AktWUS,AktWOX6,AktWOX7,AktWOX8,AktWOX1,AktWOX5,	1
biological_process	GO:0008150	0	1	1	8	8	8	8	AktWOX9,AktWUS,AktWOX6,AktWOX3,AktWOX7,AktWOX8,AktWOX1,AktWOX5,	1
embryonic morphogenesis	GO:0048598	4	1	1	1	1	8	8	AktWOX7,	1
longitudinal axis specification	GO:0009942	6	1	1	1	1	8	8	AktWOX5,	1
adaxial/abaxial axis specification	GO:0009943	5	1	1	1	1	8	8	AktWOX6,	1
metabolic process	GO:0008152	2	1	1	7	7	8	8	AktWOX9,AktWUS,AktWOX6,AktWOX7,AktWOX8,AktWOX1,AktWOX5,	1
anatomical structure development	GO:0048856	3	1	1	8	8	8	8	AktWOX9,AktWUS,AktWOX6,AktWOX3,AktWOX7,AktWOX8,AktWOX1,AktWOX5,	1
cellular biosynthetic process	GO:0044249	4	1	1	7	7	8	8	AktWOX9,AktWUS,AktWOX6,AktWOX7,AktWOX8,AktWOX1,AktWOX5,	1
regulation of primary metabolic process	GO:0080090	5	1	1	7	7	8	8	AktWOX9,AktWUS,AktWOX6,AktWOX7,AktWOX8,AktWOX1,AktWOX5,	1
centrolateral axis specification	GO:0009947	5	1	1	1	1	8	8	AktWOX6,	1
formation of anatomical boundary	GO:0048859	4	1	1	2	2	8	8	AktWOX1,AktWOX5,	1
pattern specification process	GO:0007389	3	1	1	2	2	8	8	AktWOX6,AktWOX5,	1
reproductive structure development	GO:0048608	4	1	1	6	6	8	8	AktWUS,AktWOX6,AktWOX3,AktWOX7,AktWOX1,AktWOX5,	1
morphogenesis of a branching structure	GO:0001763	4	1	1	1	1	8	8	AktWUS,	1
regulation of nitrogen compound metabolic process	GO:0051171	5	1	1	7	7	8	8	AktWOX9,AktWUS,AktWOX6,AktWOX7,AktWOX8,AktWOX1,AktWOX5,	1
gene expression	GO:0010467	5	1	1	7	7	8	8	AktWOX9,AktWUS,AktWOX6,AktWOX7,AktWOX8,AktWOX1,AktWOX5,	1
adaxial/abaxial pattern specification	GO:0009955	5	1	1	1	1	8	8	AktWOX6,	1
regulation of gene expression	GO:0010468	6	1	1	7	7	8	8	AktWOX9,AktWUS,AktWOX6,AktWOX7,AktWOX8,AktWOX1,AktWOX5,	1
cellular developmental process	GO:0048869	3	1	1	1	1	8	8	AktWOX5,	1
regulation of RNA biosynthetic process	GO:2001141	8	1	1	7	7	8	8	AktWOX9,AktWUS,AktWOX6,AktWOX7,AktWOX8,AktWOX1,AktWOX5,	1
plant organ formation	GO:1905393	4	1	1	1	1	8	8	AktWUS,	1
root development	GO:0048364	5	1	1	2	2	8	8	AktWOX9,AktWOX8,	1
response to chemical	GO:0042221	3	1	1	1	1	8	8	AktWOX9,	1
plant organ morphogenesis	GO:1905392	4	1	1	2	2	8	8	AktWOX9,AktWOX7,	1
leaf morphogenesis	GO:0009965	5	1	1	1	1	8	8	AktWOX7,	1
aromatic compound biosynthetic process	GO:0019438	5	1	1	7	7	8	8	AktWOX9,AktWUS,AktWOX6,AktWOX7,AktWOX8,AktWOX1,AktWOX5,	1
obsolete regulation of cellular macromolecule biosynthetic process	GO:2000112	0	1	1	7	7	8	8	AktWOX9,AktWUS,AktWOX6,AktWOX7,AktWOX8,AktWOX1,AktWOX5,	1
leaf development	GO:0048366	6	1	1	4	4	8	8	AktWOX6,AktWOX7,AktWOX1,AktWOX5,	1
cellular nitrogen compound biosynthetic process	GO:0044271	5	1	1	7	7	8	8	AktWOX9,AktWUS,AktWOX6,AktWOX7,AktWOX8,AktWOX1,AktWOX5,	1
secondary shoot formation	GO:0010223	6	1	1	1	1	8	8	AktWUS,	1
shoot system development	GO:0048367	5	1	1	5	5	8	8	AktWUS,AktWOX6,AktWOX7,AktWOX1,AktWOX5,	1
biological regulation	GO:0065007	2	1	1	8	8	8	8	AktWOX9,AktWUS,AktWOX6,AktWOX3,AktWOX7,AktWOX8,AktWOX1,AktWOX5,	1
cell communication	GO:0007154	3	1	1	1	1	8	8	AktWOX3,	1
multicellular organismal process	GO:0032501	2	1	1	8	8	8	8	AktWOX9,AktWUS,AktWOX6,AktWOX3,AktWOX7,AktWOX8,AktWOX1,AktWOX5,	1
developmental process	GO:0032502	2	1	1	8	8	8	8	AktWOX9,AktWUS,AktWOX6,AktWOX3,AktWOX7,AktWOX8,AktWOX1,AktWOX5,	1
response to endogenous stimulus	GO:0009719	3	1	1	1	1	8	8	AktWOX9,	1
multicellular organism reproduction	GO:0032504	3	1	1	1	1	8	8	AktWUS,	1
nucleobase-containing compound metabolic process	GO:0006139	5	1	1	7	7	8	8	AktWOX9,AktWUS,AktWOX6,AktWOX7,AktWOX8,AktWOX1,AktWOX5,	1
establishment or maintenance of cell polarity	GO:0007163	3	1	1	1	1	8	8	AktWOX1,	1
response to hormone	GO:0009725	5	1	1	1	1	8	8	AktWOX9,	1
signal transduction	GO:0007165	5	1	1	1	1	8	8	AktWOX3,	1
regulation of developmental growth	GO:0048638	5	1	1	2	2	8	8	AktWOX7,AktWOX1,	1

## Sheet: Protien sequence
Gene name	Protein sequence
AktWUS	METQQDPQQQQLLQQQTLHEDGSTGSSSKSSFLCRQTSTRWTPTTDQIRILKDLYYNNGVRSPSGEQIQRISARLRQYGKIEGKNVFYWFQNHKARERQKKRFTVDMAVQRSGAASSLTFSPTGFSTPSSPSSPGVLGVGQMGSMGCGSVLMEKSFRDCTISSGGSGMGGSISNNMGWVGVDPYSSSYPFYDKMKSIETFKEETPEIETLPLFPMHGEDISGFCTGNPDPNGYNTSSYRPDDEKGSTRTSLELSLNSYTGRSPYTD
AktWOX1	MASSNRHWPSMFKSKPCNNHHQWQHDINSSLISSCQRPPYTSGFEERSPDPKPRWNPKPEQIRILEAIFNSGMVNPPRDEIRKIRTQLQEYGQVGDANVFYWFQNRKSRSKHKQRHLQTSKSHSQSPPVNTFTTAPSSSSSSSSEKSSPKKTNKMLAMGGVNMIDLSNSPTASVNQTYFQTQGDFSSDQPFFFPVQQIEGNTVFSQGFCFSDISNVQIPDQTIGSCSGFLIGELLNQEVSKEEEEKMKFHQQLSYIHSSPTTTLTTSIPLTITSPTSTINPTTFNQIQGVGESGAVDPADAGRSTVFINDVAFEVSVGPFNVRQAFGDDAVLLHSSGQPVLTNQWGVTFQSLQPGAFYYLV
AktWOX2	MGLERNCGEREKQLRTMEWVKQEQQQQQQSGVMYVKVMTDEQMELLRKQISIYATICEQLVEMHKAITAQQDLAGTKLGNLYCDSLMTSTGHKISSRQRWTPTPVQLQILERIFDQGNGTPTKQKIKEITNELTQHGQISETNVYNWFQNRRARSKRKQLVSTPNNAESEVETEDNSPKEKKAKSENTHSPDNLTLRPDEMCFQSPEISSELHSFDPQPNQAESTFPSNGSSKSSGSMGHISFYETVLSNPRIDHLLGKMEMPGSFNPYRQGEGYDMMG
AktWOX3	MKVHQFTRGFWEHEPSLTLGCKRLRPLAPKLTNGDTVTPLDLKSFIKADSGPRKLSCTDDHKRESPQVEAQSGGTRWNPTQEQIGILEMLYRGGMRTPNAQQIEQITAQLSKFGKIEGKNVFYWFQNHKARERQKQKRNSLGLTHSPRTPTATTIVPTDANGEVEREEDSNYKRKQRSWAMENCFEEDRRFCGDYDQGDKTLELFPLHPEGR
AktWOX4	MGLEENCVEGEDQQRMMEWGRPQQQQSGALYVKVMTDEQMELLRKQISIYATICERLVEMHKSITSQQDLAGMKPGTLYCDPLMTSTGHKMSSRQRWTPTPVQLQILEHIFNQGNGTPSKPKIKEITNELMQHAQLSETNVYNWFQNRRARSKRKQLVTAPNNGESEVETEDESPKEKKAKTENIHSHENLALRPDEKCLQSSERHSLDPQHNKVENTFPSDGGSKSSGSLGHISFYESVLSNPRMDHLLGKMEVPGSFNPYQQGEGDMI
AktWOX5	MEDKKVDVSLSGEGHPASWRWNPTNEQISMLEALYREGIKTPSAEQIQEITSRLKAYGYLEEKNVFYWFQNHKARQRQKQRQKQDEKLFYINHSSRSPPILPSTPASSNVVCSPFNIQQRGFDYYQCTNASLLGGIRRTPNTNTDKMDKRKENGGAGYEYNMYPTQYDIIHTTNVKSNGNPQTLVLFPLHPTGILEEKSRNPFNASFAVNSNQSTSVETFIDDGSRDTNSL
AktWOX6	MSPATSTRWCPTPEQLMILEEMYRGGIRTPNGSQIQQITAHLSFYGKIEGKNVFYWFQNHKARDRQKLRRKLSRQQQQLQQQTTNHHLLHHFEASPSTGFQQFHHYNLPQFLPQEGLQEASTQVMNYTWKVDNPESDEMEKWMKMYGRDWMMMMDVGPAPPCYSRPLKTLELFPINSTNLKDECSTSKQHVSFSTTTN
AktWOX7	MWMMGCSDNGGLNISDSPFNGRKLRPLIPRATTSSSSSSSITTTTNATHPCLNLIHTSDLFMLNHHLATVSEQSKRDFNAQTVVSSRWNPTPEQLQTLEELYRRGTRTPTADQIQQITVQLRRFGKIEGKNVFYWFQNHKARERQKRRRQAESTTEQQQQQQQQQQQREIENFENKELDFQVEQAKRWALPTNSSTLSEDAVSMQRAGRAVIAESRTDGWIQFEERELQQRRRSVESHATWQMMHINATTSAITTTIGRTTMNPMLTNTQNPIRESESQTLQLFPLRSEDVEEKEKELPISSKNNNCTPYQYFEFL
AktWOX8	MEDRVPESNSPSYGSERTEPVRSRWTPKPEQILILESIFNSGMVNPPKDETVRIRKMLEKYGSVGDANVFYWFQNRRSRSRRRQRQIQAGLTNDPRNPIQGGGSGVIRYEPTSSVGCFASSPSFSPSLSSSTSFVGSSSTCGGVSDGVDDLFSISHQMGLPEIDQNLCSSDTSNLHYESGLLTVFINGVPTEVPRGPFDMKAMFGQDVMLVHSSGVPVPVNEYGISLQSLLLGESYFLNFFFSWKVNTSFEVFRETLKINVVIHL
AktWOX9	MDEGMSGFCIKAGNGGINGGGTKCGRWNPTAEQVKVLTDLFRSGLRTPSTDQIQKISSQLSFYGKIESKNVFYWFQNHKARERQKRRRVSFEDRGSIDREEKSLPTKHFREVNQVKKPEREIETLQLFPLNPYEESESDEKLGWMRNEFKETTNAFSYVIGREIDHPPLDLRLSFF
